# Supplementary material for: A Comparison between High-Performance Countercurrent Chromatography and Fast-Centrifugal Partition Chromatography for a One-Step Isolation of Flavonoids from Peanut Hulls Supported by a Conductor like Screening Model for Real Solvents
Source: MDPI journal article supplement (doi:10.3390/molecules28135111), 2023-06-29
Supplement: s1 [file s1]

## Supplementary Material

### **A Comparison between High-Performance Countercurrent Chromatography and Fast-Centrifugal Partition Chromatography for a One-Step Isolation of Flavonoids from Peanut Hulls supported by a Conductor Like Screening Model for Real Solvents**

Mats Kiene, Svenja Blum, Gerold Jerz, Peter Winterhalter \*

Institute of Food Chemistry, Technische Universität Braunschweig, Schleinitzstrasse 20, 38106 Braunschweig, Germany

\* Corresponding author: e-mail address: p.winterhalter@tu-braunschweig.de

### **Section S1: All-liquid solvent system prediction for countercurrent chromatography by *in-silico* calculation by COSMOthermX (Version 22.0.0)**

Table S1. COSMOthermX phase equilibrium data at 20°C with the TZVPD-FINE parametrization.

| HEMWat system | upper phase     |               |            |          | lower phase     |               |          |          |
|---------------|-----------------|---------------|------------|----------|-----------------|---------------|----------|----------|
|               | <i>n</i> -hexan | ethyl acetate | methanol   | water    | <i>n</i> -hexan | ethyl acetate | methanol | water    |
| 1             | 0,6261484       | 0,2642299     | 0,09687997 | 0,012742 | 0,001761        | 0,056739      | 0,367214 | 0,574286 |
| 2             | 0,4562505       | 0,3854792     | 0,12502891 | 0,033241 | 6,50E-04        | 0,046772      | 0,277996 | 0,674583 |
| 3             | 0,3260028       | 0,4481006     | 0,16517847 | 0,060718 | 6,19E-04        | 0,049112      | 0,270616 | 0,679654 |
| 4             | 0,4819859       | 0,3956727     | 0,09264124 | 0,029700 | 2,69E-04        | 0,036103      | 0,211384 | 0,752244 |
| 5             | 0,3283396       | 0,4835309     | 0,1273308  | 0,060799 | 2,44E-04        | 0,038168      | 0,202029 | 0,759559 |
| 6             | 0,2197297       | 0,5279000     | 0,15522038 | 0,09715  | 2,24E-04        | 0,039463      | 0,195889 | 0,764424 |
| 7             | 0,2593752       | 0,5410544     | 0,1178212  | 0,081749 | 1,29E-04        | 0,033700      | 0,158159 | 0,808012 |
| 8             | 0,1845486       | 0,6081034     | 0,09734163 | 0,110006 | 5,82E-05        | 0,029245      | 0,10998  | 0,860717 |
| 9             | 0,1439575       | 0,6469077     | 0,08145471 | 0,12768  | 3,55E-05        | 0,02708       | 0,084225 | 0,88866  |
| 10            | 0,069242        | 0,7234064     | 0,04359298 | 0,163759 | 1,11E-05        | 0,023661      | 0,038771 | 0,937557 |

### **Section S2: HPLC-DAD analysis of the main compound distributions in the phase layers of shake flask experiments by calculation of specific compound partition ratio $K_D$ -values**

HPLC-DAD prediction of partition ratio values were calculated with Equation S1 [1]:

$$K_D\text{-value} = \text{peak area A upper phase} / \text{peak area A lower phase} \quad \text{Eq. S1}$$

Table S2. Target compound specific  $K_D$ -values from shake flask experiments measured by HPLC-DAD ( $\lambda = 280$  nm).

| compound                       | retention time [min] | upper phase [mAU*min] | lower phase [mAU*min] | $K_{u/l}$ |
|--------------------------------|----------------------|-----------------------|-----------------------|-----------|
| 5,7-dihydroxychromone <b>3</b> | 12.4                 | 20.3                  | 13.0                  | 1.56      |
| eriodictyol <b>2</b>           | 19.2                 | 108.1                 | 126.1                 | 0.86      |
| luteolin <b>1</b>              | 21.9                 | 54.7                  | 94.3                  | 0.58      |

### Section S3: TLC screening of HPCCC fractions

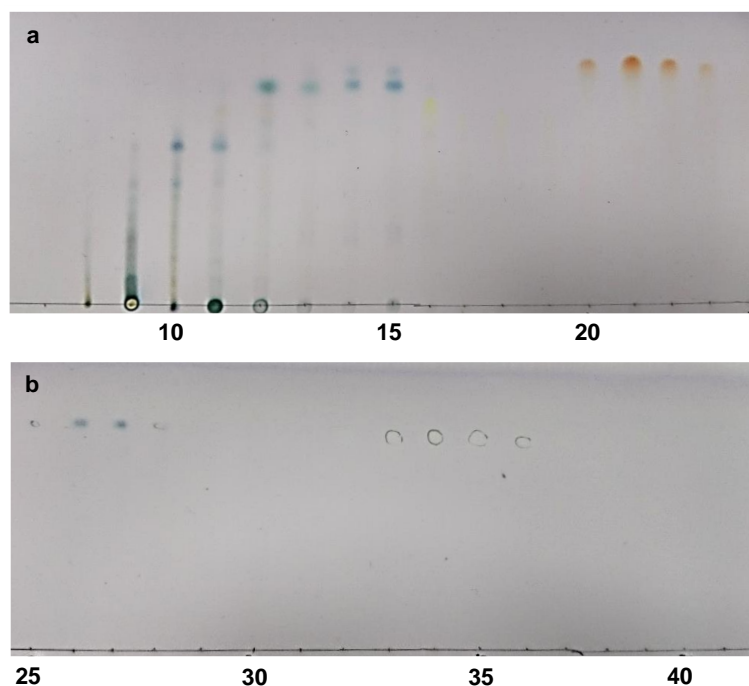

Figure S1. TLC analysis of the HPCCC fractions; a) fractions 8–24 b) fractions 25–41. Normal phase silica gel TLC plates were developed with chloroform/ethyl acetate/methanol/water (25/55/5/1; v/v/v/v). Visualization was done using spray reagent anisaldehyde-sulfuric acid-glacial acid (universal reagent Egon Stahl [2]) and thermo-development (105 °C).

### Section S4: TLC screening of FCPC fraction

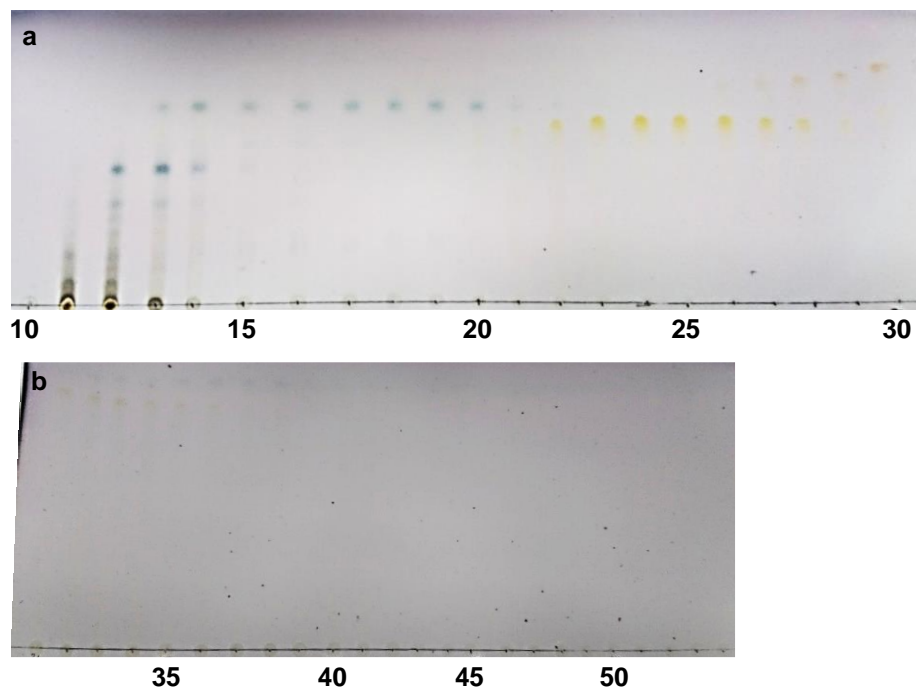

Figure S2. TLC analysis of the FCPC fractions; a) fractions 10–30 b) fractions 31–54. Normal phase silica gel TLC plates were developed with chloroform/ethyl acetate/methanol/water (25/55/5/1; v/v/v/v). Visualization was done using spray reagent anisaldehyde-sulfuric acid-glacial acid (universal reagent Egon Stahl [2]) and thermo-development (105 °C). The following fractions were combined in steps of 20, as the contents of the compounds were too low to detect them.

## Section S5: Calculation of countercurrent chromatographic separation parameters

The chromatographic elution time was converted over *elution/retention volumes*  $V_R$  into their respective *partition ratio values*  $K_D$  (cf. Equations S2-S9). The  $K_D$ -based projection enables a better comparison between different liquid/liquid chromatography based machine designs such as fast-centrifugal partition chromatography (FCPC), and high-performance countercurrent chromatography (HPCCC). The experimental  $V_R$ -values of the three flavonoids luteolin **1**, eriodictyol **2** and 5,7-dihydroxychromone **3** from the FCPC and HPCCC runs were screened by thin-layer chromatography (TLC) and calculated with Equation S2.

$$\text{Retention volume } V_R = \text{elution time [min]} \times \text{flow rate [mL/min]} \quad (\text{Eq. S2})$$

The  $S_F$ -values of the used solvent systems were determined by Equations S3a-b using  $V_C$  (FCPC: 200 mL; HPCCC: 125 mL), and  $V_M$  resulting in the  $S_F$ -value measured at the hydrodynamic equilibrium.

$$V_S = (V_C - V_M) \quad (\text{Eq. S3a})$$

$$S_F = V_S / V_C \times 100\% \quad (\text{Eq. S3b})$$

FCPC:  $S_F = 91\%$

HPCCC:  $S_F = 83\%$

$V_S$ : retained experimental stationary phase volume

$V_C$ : column volume/capacity (FCPC: 200 mL; HPCCC: 125 mL)

$V_M$ : volume of mobile phase take up to the coil at equilibrium of FCPC and HPCCC

$V_R$ : retention volume (delivered mobile phase volumes until metabolite elution)

$S_F$ : stationary phase retention in [%]

$K_D$ : partition ratio

The determined  $S_F$ -value in the experiments is corrected by the *extra column volume*  $V_{ext}$  (FCPC: 10 mL; HPCCC: 7 mL) [3] of the connecting periphery tubing in the FCPC and HPCCC set-ups, using Equations S4-S6

$$\text{Corrected } V_M = V_M - V_{ext} \quad (\text{Eq. S4})$$

FCPC: *corr.*  $V_M = 18 \text{ mL} - 10 \text{ mL} = 8 \text{ mL}$

HPCCC: *corr.*  $V_M = 21 \text{ mL} - 7 \text{ mL} = 14 \text{ mL}$

$$\text{Corrected } V_S = V_C - \text{corrected } V_M \quad (\text{Eq. S5})$$

FCPC: *corr.*  $V_S = 200 \text{ mL} - 8 \text{ mL} = 192 \text{ mL}$

HPCCC: *corr.*  $V_S = 125 \text{ mL} - 14 \text{ mL} = 111 \text{ mL}$

$$\text{Corrected } S_F = \text{corrected } V_S / V_C \quad (\text{Eq. S6})$$

FCPC: *corr.*  $S_F = 192 \text{ mL} / 200 \text{ mL} \times 100\% = 96\%$

HPCCC: *corr.*  $S_F = 111 \text{ mL} / 125 \text{ mL} \times 100\% = 89\%$

It should be noted that in general a high  $S_F$ -value directly correlate to a higher resolution and efficiency of the FCPC and HPCCC separations.

The compound and solvent system specific partition ratio  $K_D$ -values in the FCPC and HPCCC runs were calculated by the Equation S7.

During *elution-mode*: [4]

$$K_D = (V_R - \text{corrected } V_M) / \text{corrected } V_S \quad (\text{Eq. S7})$$

The *separation factor*  $\alpha$  and *resolution factor*  $R_S$  depend on the distances between peaks and the peak widths that will be compared. The calculation of both factors depend on the determined  $K_D$ -values.

$$\alpha = K_{D2} / K_{D1} \text{ (with } K_{D2} > K_{D1}) \quad (\text{Eq. S8})$$

The calculation of the *resolution factor*  $R_S$  described how well two peaks are separated at the baseline from each other.

$$R_S = 2 (K_{D2} - K_{D1}) / (W_2 + W_1) \quad (\text{Eq. S9})$$

$W_n$ : peak width at baseline

## Section S6: ESI-MS/MS and 1D/2D-NMR spectral data of isolated compounds

Table S3. ESI-MS/MS data of isolated compounds 1-3.

| comp. | MW<br>[g/mol] | ESI<br>polarity | pseudo<br>molecular ion | parent ion<br>m/z | m/z from MS <sup>2</sup>                                                                       |
|-------|---------------|-----------------|-------------------------|-------------------|------------------------------------------------------------------------------------------------|
| 1     | 286           | neg.            | [M-H] <sup>-</sup>      | 285               | 257(37), 241(68), 223(16), 217(35),<br><u>199(100)</u> , 175(29), 151(19), 149(12),<br>133(11) |
| 2     | 288           | neg.            | [M-H] <sup>-</sup>      | 287               | 269(3), <u>151(100)</u> , 135(10), 125(1),<br>107(7)                                           |
| 3     | 178           | neg.            | [M-H] <sup>-</sup>      | 177               | <u>133(100)</u>                                                                                |

<sup>a</sup> Base peaks are underlined, MS<sup>2</sup> relative intensities in brackets

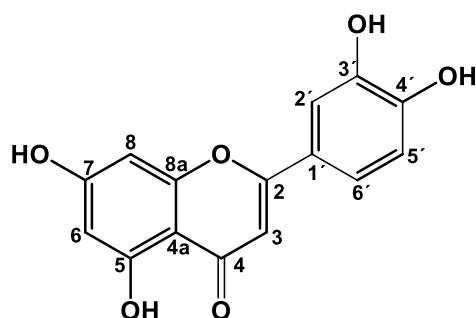

Figure S3. Structure of luteolin 1.

Table S4. NMR data of luteolin 1.<sup>a</sup>

| Position <sup>b</sup> | <sup>13</sup> C: $\delta_c$ [ppm] (DEPT135) | <sup>1</sup> H: $\delta_H$ [ppm]; mult., J [Hz] <sup>c</sup> | HMBC            |
|-----------------------|---------------------------------------------|--------------------------------------------------------------|-----------------|
| 2                     | 163.9 (C)                                   |                                                              |                 |
| 3                     | 102.8 (C)                                   | 6.68; s                                                      | C-2, 4, 4a, 1'  |
| 4                     | 181.6 (C)                                   |                                                              |                 |
| 4a                    | 103.6 (C)                                   |                                                              |                 |
| 5                     | 161.4 (C)                                   |                                                              |                 |
| 6                     | 98.8 (CH)                                   | 6.20; d, J = 2.1                                             | C-4a, 5, 7, 8   |
| 7                     | 164.1 (C)                                   |                                                              |                 |
| 8                     | 93.8 (CH)                                   | 6.45; d, J = 2.1                                             | C-4a, 6, 7, 8a  |
| 8a                    | 157.6 (C)                                   |                                                              |                 |
| 1'                    | 121.4 (C)                                   |                                                              |                 |
| 2'                    | 113.3 (CH)                                  | 7.40; d, J = 2.1                                             | C-2, 3', 4', 6' |
| 3'                    | 145.7 (C)                                   |                                                              |                 |
| 4'                    | 149.9 (C)                                   |                                                              |                 |
| 5'                    | 116.0 (CH)                                  | 6.90; d, J = 8.3                                             | C-1', 3', 4'    |
| 6'                    | 119.0 (CH)                                  | 7.42; dd, J <sub>1</sub> = 8.3/ J <sub>2</sub> = 2.3         | C-2, 2', 4'     |
| 5-OH                  | -                                           | 12.98; s                                                     | C-4a, 5, 6      |

<sup>a</sup> Solvent: dimethylsulfoxide-*d*<sub>6</sub>; tetramethylsilane  $\delta$  0.00 ppm for <sup>1</sup>H,  $\delta$  39.5 ppm for <sup>13</sup>C; <sup>1</sup>H observed frequency 500.32 MHz.

<sup>b</sup> For numbering of the carbon atoms, see the formula, assignment of C-H via HSQC data.

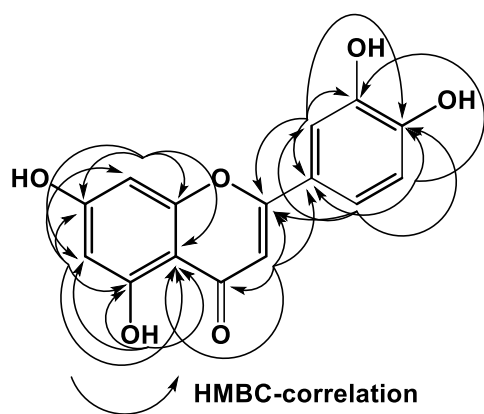

Figure S4. Structure relevant long-range HC-correlation signals observed in the HMBC of luteolin **1**.

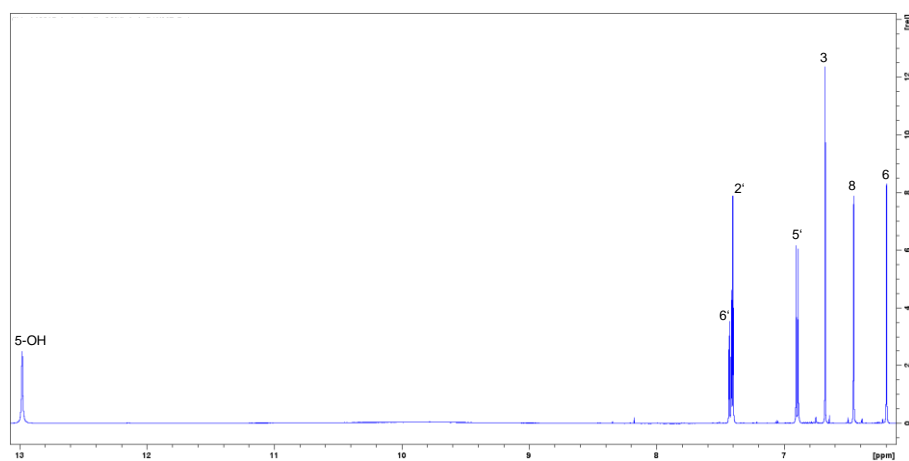

Figure S5. <sup>1</sup>H-NMR spectrum of luteolin **1**.

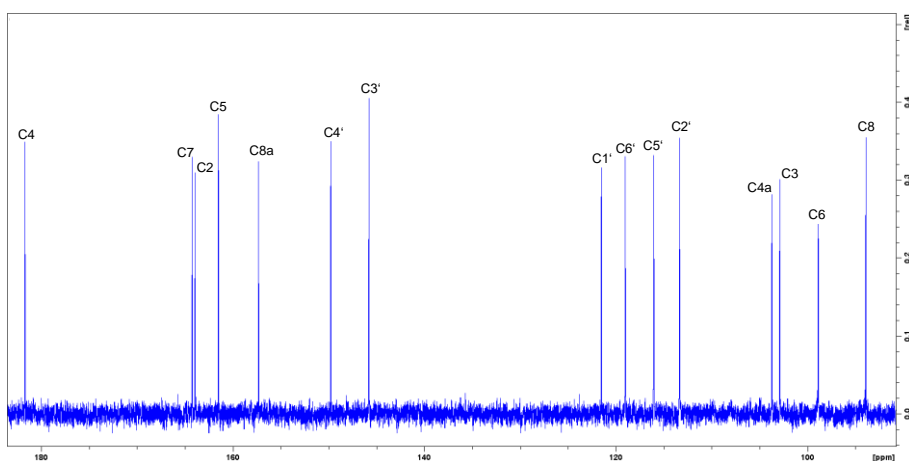

Figure S6. <sup>13</sup>C-NMR spectrum of luteolin **1**.

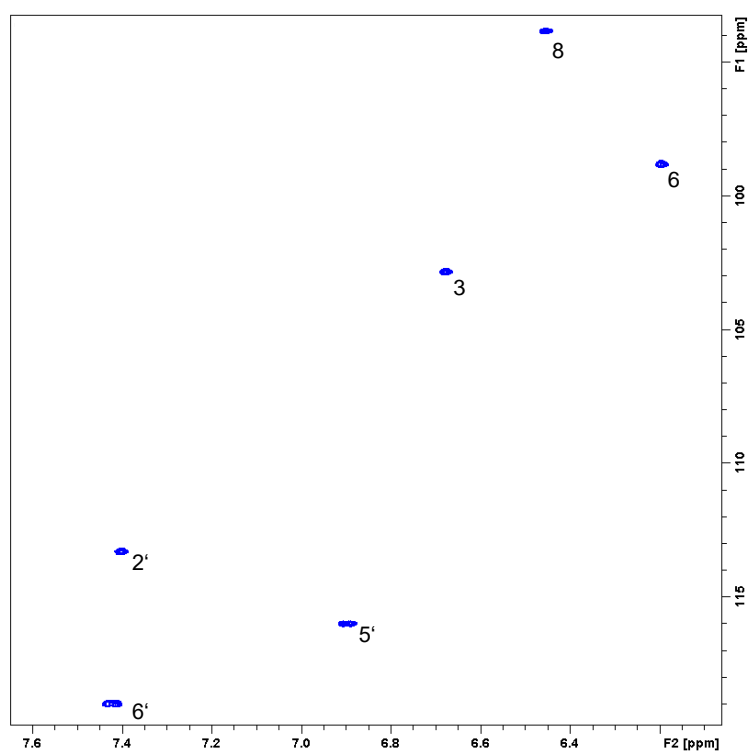

Figure S7. HSQC spectrum of luteolin 1.

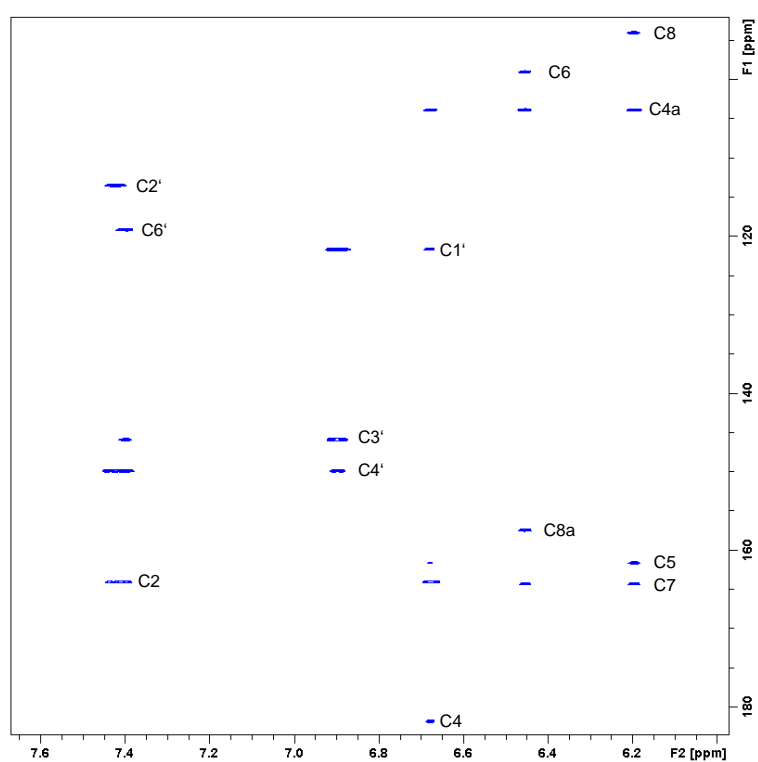

Figure S8. HMBC spectrum of luteolin 1.

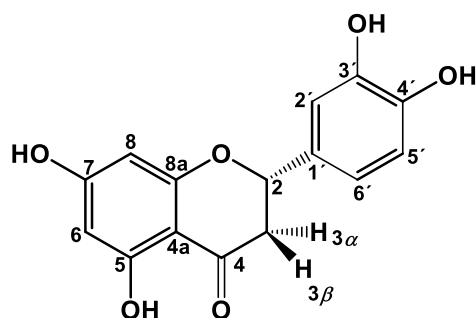

Figure S9. Structure of eriodictyol **2**.

Table S5. NMR data of eriodictyol **2**.<sup>a</sup>

| Position <sup>b</sup> | <sup>13</sup> C: $\delta_c$ [ppm] (DEPT135) | <sup>1</sup> H: $\delta_H$ [ppm]; mult., $J$ [Hz] <sup>c</sup>                           | HMBC                      |
|-----------------------|---------------------------------------------|------------------------------------------------------------------------------------------|---------------------------|
| 2                     | 78.4 (CH)                                   | 5.38; dd, $J_1 = 12.5/ J_2 = 3.1$                                                        | C-3, 4, 8a, 1', 2', 6'    |
| 3                     | 42.0 (CH <sub>2</sub> )                     | $\alpha$ 3.19; dd, $J_1 = 17.1/ J_2 = 12.5$<br>$\beta$ 2.67; dd, $J_1 = 17.1/ J_2 = 3.2$ | C-2, 4, 1'<br>C-4, 4a, 1' |
| 4                     | 196.3 (CH <sub>q</sub> )                    |                                                                                          |                           |
| 4a                    | 101.7 (C)                                   |                                                                                          |                           |
| 5                     | 163.4 (C)                                   |                                                                                          |                           |
| 6                     | 95.6 (CH)                                   | 5.87; d, $J = 2.1$                                                                       | C-4a, 5, 7, 8             |
| 7                     | 166.5 (C)                                   |                                                                                          |                           |
| 8                     | 94.9 (CH)                                   | 5.88; d, $J = 2.1$                                                                       | C-4a, 6, 7, 8a            |
| 8a                    | 162.8 (C)                                   |                                                                                          |                           |
| 1'                    | 129.3 (C)                                   |                                                                                          |                           |
| 2'                    | 114.2 (CH)                                  | 6.87; s                                                                                  | C-2, 1', 3', 4', 6'       |
| 3'                    | 145.1 (C)                                   |                                                                                          |                           |
| 4'                    | 145.6 (C)                                   |                                                                                          |                           |
| 5'                    | 115.2 (CH)                                  | 6.74; m                                                                                  | C-1', 3', 4'              |
| 6'                    | 117.9 (CH)                                  | 6.74; m                                                                                  | C-2, 1', 2', 4'           |
| 5-OH                  | -                                           | 12.14; s                                                                                 | C-4a, 5, 6                |

<sup>a</sup> Solvent: dimethylsulfoxide-*d*<sub>6</sub>; tetramethylsilane  $\delta$  0.00 ppm for <sup>1</sup>H,  $\delta$  39.5 ppm for <sup>13</sup>C; <sup>1</sup>H observed frequency 500.32 MHz.

<sup>b</sup> For numbering of the carbon atoms, see the formula, assignment of C-H via HSQC data.

<sup>c</sup> For CH<sub>2</sub> groups with diastereotopic protons  $\alpha$  and  $\beta$  indicate the deshielded and shielded nucleus, respectively.

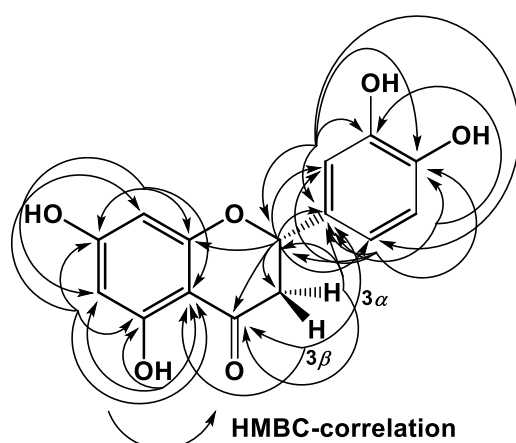

Figure S10. Structure relevant long-range HC-correlation signals observed in the HMBC of eriodictyol **2**.



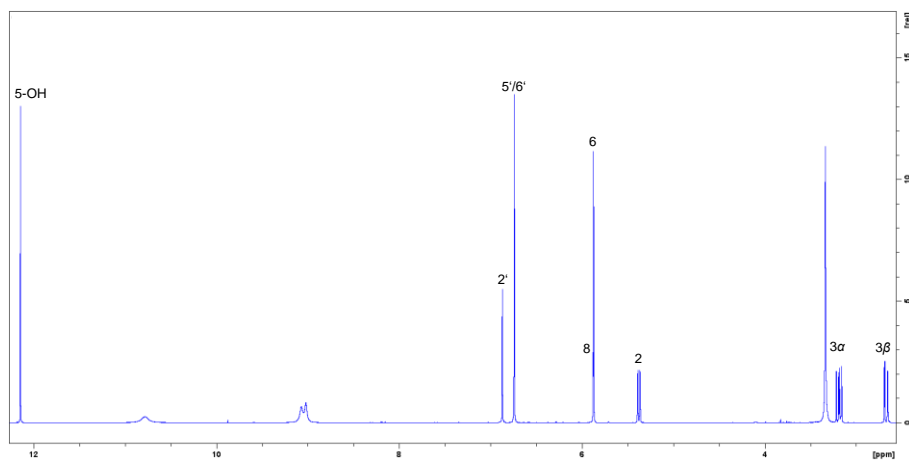

Figure S11.  $^1\text{H}$ -NMR spectrum of eriodictyol **2**.

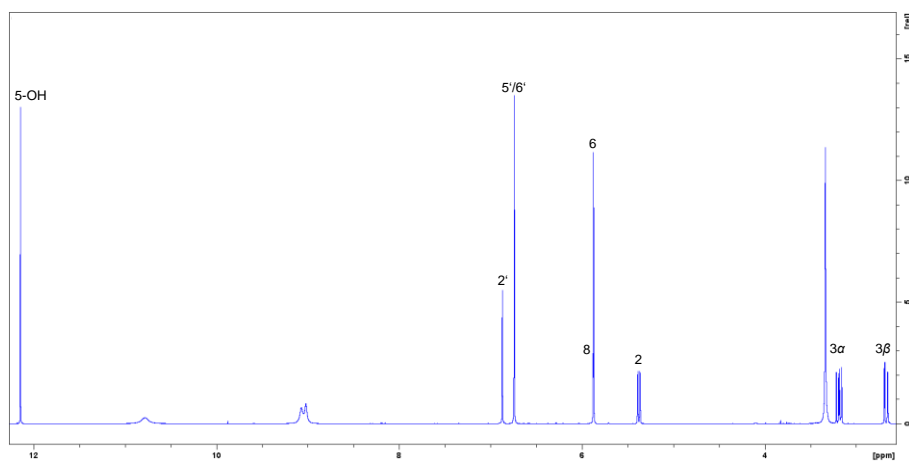

Figure S12.  $^{13}\text{C}$ -NMR spectrum of eriodictyol **2**.

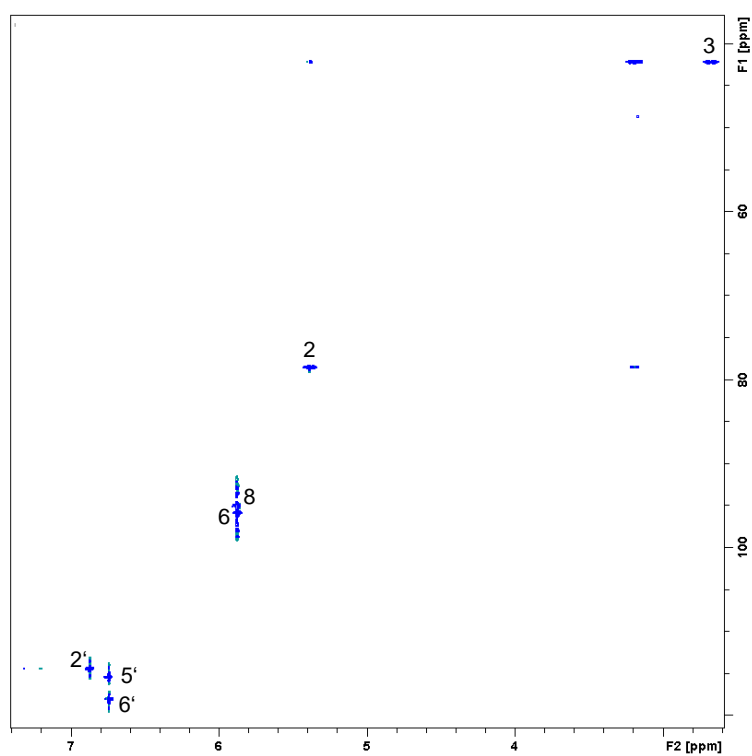

Figure S13. HSQC spectrum of eriodictyol **2**.

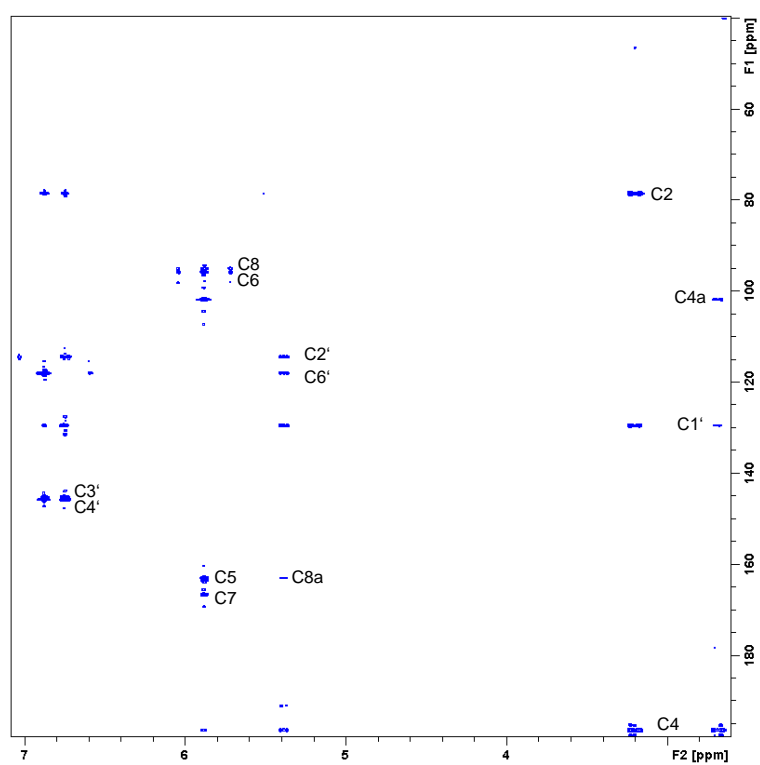

Figure S14. HMBC spectrum of eriodictyol **2**.

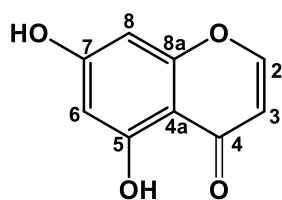

Figure S15. Structure of 5,7-dihydroxychromone **3**.

Table S6. NMR data of 5,7-dihydroxychromone **3**.<sup>a</sup>

| Position <sup>b</sup> | <sup>13</sup> C: $\delta_c$ [ppm] (DEPT135) | <sup>1</sup> H: $\delta_H$ [ppm]; mult., $J$ [Hz] <sup>c</sup> | HMBC           |
|-----------------------|---------------------------------------------|----------------------------------------------------------------|----------------|
| 2                     | 157.2 (CH)                                  | 8.16; d, $J = 5.9$                                             | C-3, 4, 8a     |
| 3                     | 110.3 (CH)                                  | 6.26; d, $J = 5.9$                                             | C-2, 4a        |
| 4                     | 181.0 (C)                                   |                                                                |                |
| 4a                    | 104.5 (C)                                   |                                                                |                |
| 5                     | 161.5 (C)                                   |                                                                |                |
| 6                     | 99.1 (CH)                                   | 6.16; d, $J = 2.0$                                             | C-4a, 5, 7, 8  |
| 7                     | 165.0 (C)                                   |                                                                |                |
| 8                     | 94.0 (CH)                                   | 6.33; d, $J = 2.0$                                             | C-4a, 6, 7, 8a |
| 8a                    | 157.7 (C)                                   |                                                                |                |
| 5-OH                  | -                                           | 12.69; s                                                       | C-4a, 5, 6     |

<sup>a</sup> Solvent: dimethylsulfoxide- $d_6$ ; tetramethylsilane  $\delta$  0.00 ppm for <sup>1</sup>H,  $\delta$  39.5 ppm for <sup>13</sup>C; <sup>1</sup>H observed frequency 500.32 MHz.

<sup>b</sup> For numbering of the carbon atoms, see the formula, assignment of C-H via HSQC data.

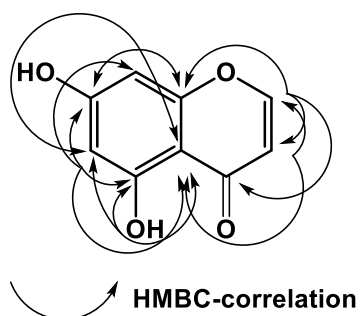

Figure S16. Structure relevant long-range HC-correlation signals observed in the HMBC of 5,7-dihydroxychromone **3**.

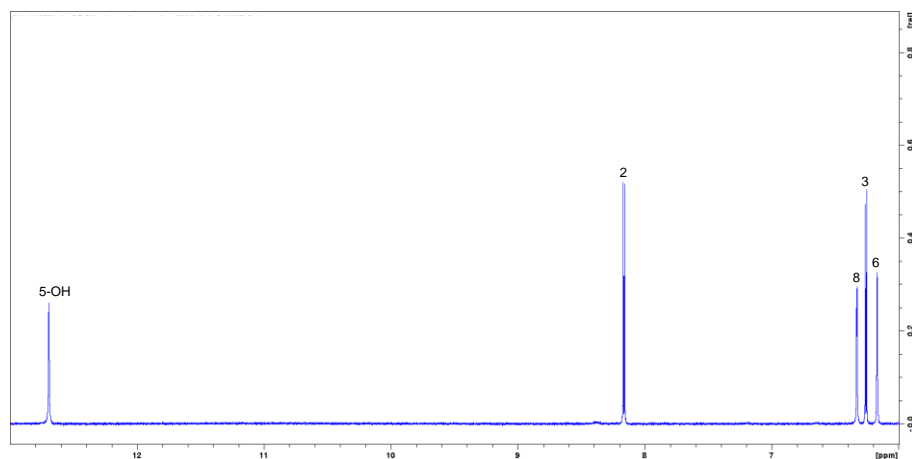

Figure S17. <sup>1</sup>H-NMR spectrum of 5,7-dihydroxychromone **3**.

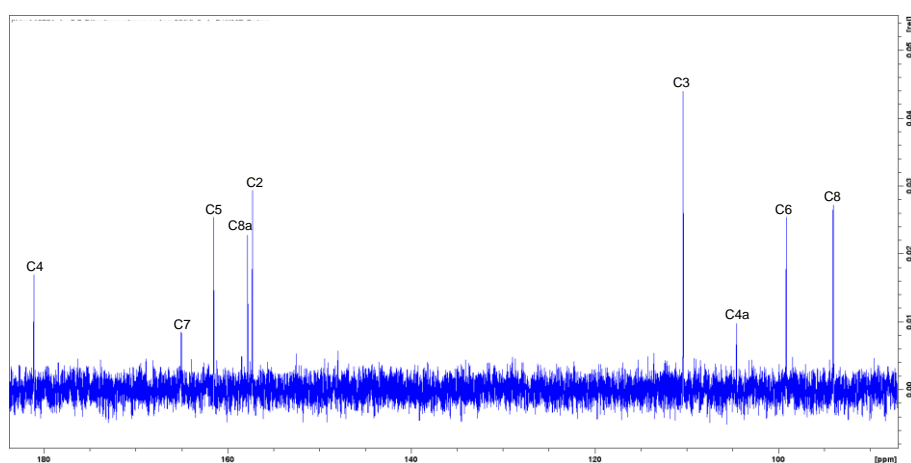

Figure S18.  $^{13}\text{C}$ -NMR spectrum of 5,7-dihydroxychromone **3**.

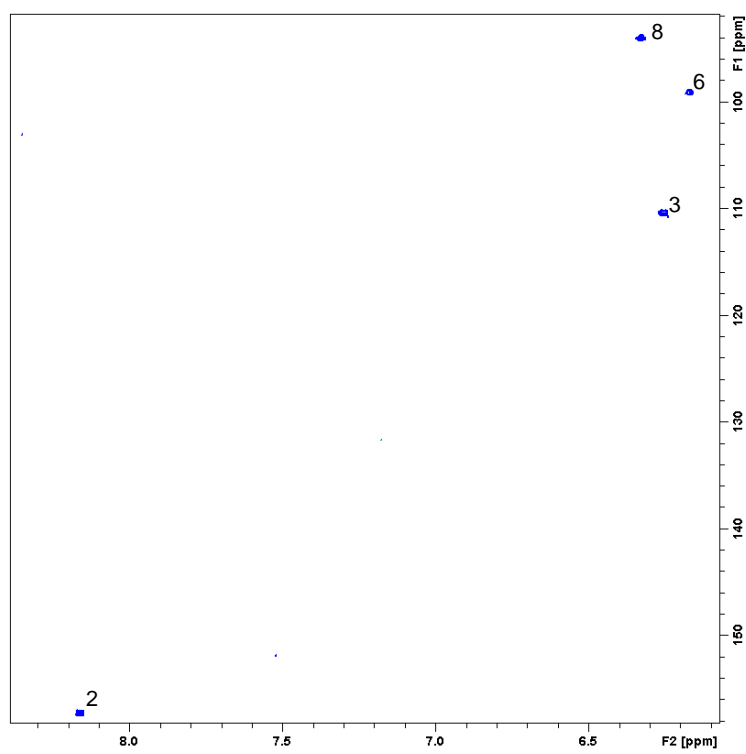

Figure S19. HSQC spectrum of 5,7-dihydroxychromone **3**.

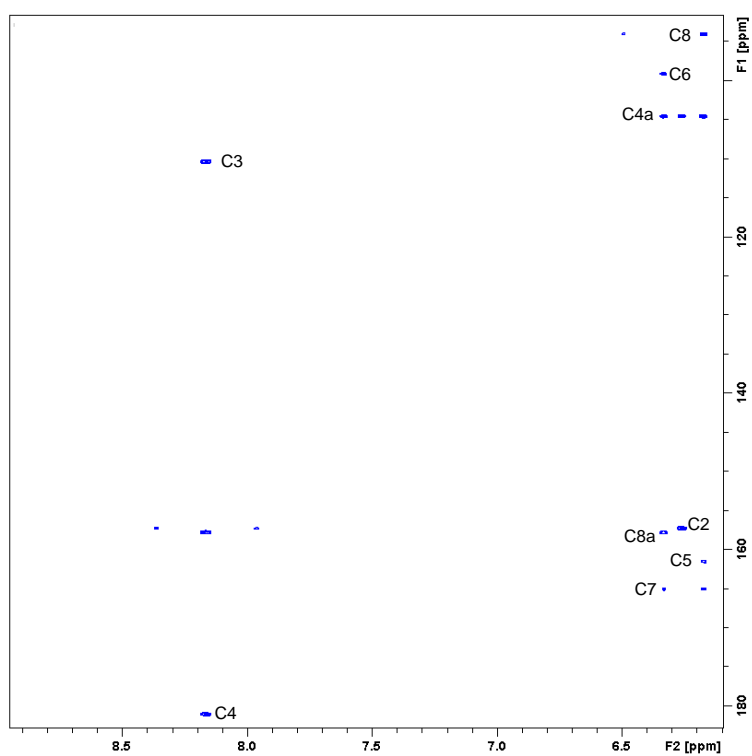

Figure S20. HMBC spectrum of 5,7-dihydroxychromone **3**.

## References

1. Ito, Y. Golden Rules and Pitfalls in Selecting Optimum Conditions for High-Speed Counter-Current Chromatography. *J. Chromatogr. A* **2005**, 1065 (2), 145–168.
2. Stahl, E.; Kaltenbach, U. Dünnschicht-Chromatographie: VI. Mitteilung. Spurenanalyse von Zuckergemischen Auf Kieselgur G-Schichten. *J. Chromatogr. A* **1961**, 5 (1961), 351–355.
3. Costa, F. das N.; Vieira, M.N.; Garrard, I.; Hewitson, P.; Jerz, G.; Leitão, G.G.; Ignatova, S. *Schinus terebinthifolius* Countercurrent Chromatography (Part II): Intra-Apparatus Scale-up and Inter-Apparatus Method Transfer. *J. Chromatogr. A* **2016**, 1466, 76–83.
4. Berthod, A.; Friesen, J.B.; Inui, T.; Pauli, G.F. Elution–Extrusion Countercurrent Chromatography: Theory and Concepts in Metabolic Analysis. *Anal. Chem.* **2007**, 79 (9), 3371–3382.
